# Supplementary material for: Supporting Vulnerable People During Challenging Transitions: A Systematic Review of Critical Time Intervention
Source: Springer Nature journal article supplement (doi:10.1007/s10488-022-01224-z), 2022-10-14
Supplement: MOESM1 [file 10488_2022_1224_MOESM1_ESM.pdf]

## Appendix A. Summary of reported client-level outcomes

| Author                                                                                                     | Follow-up                | Outcome                                                                                                                                                                                                                                                                                                                                                                                                                                                                                                                                                                                                                                                                                                                                                                                                                                                                                                                                                                                                                 | Instrument                                                                                                                                                                                                                                                                                                                                                                                                  | Effect                                                                                                                                                                                                                                                                                                                                                                                                                                                                           |
|------------------------------------------------------------------------------------------------------------|--------------------------|-------------------------------------------------------------------------------------------------------------------------------------------------------------------------------------------------------------------------------------------------------------------------------------------------------------------------------------------------------------------------------------------------------------------------------------------------------------------------------------------------------------------------------------------------------------------------------------------------------------------------------------------------------------------------------------------------------------------------------------------------------------------------------------------------------------------------------------------------------------------------------------------------------------------------------------------------------------------------------------------------------------------------|-------------------------------------------------------------------------------------------------------------------------------------------------------------------------------------------------------------------------------------------------------------------------------------------------------------------------------------------------------------------------------------------------------------|----------------------------------------------------------------------------------------------------------------------------------------------------------------------------------------------------------------------------------------------------------------------------------------------------------------------------------------------------------------------------------------------------------------------------------------------------------------------------------|
| <b>Experimental</b>                                                                                        |                          |                                                                                                                                                                                                                                                                                                                                                                                                                                                                                                                                                                                                                                                                                                                                                                                                                                                                                                                                                                                                                         |                                                                                                                                                                                                                                                                                                                                                                                                             |                                                                                                                                                                                                                                                                                                                                                                                                                                                                                  |
| Crampton et al 2020<br>(Collins et al 2020)                                                                | 24 months                | Housing: use of emergency shelter<br>Housing: use of coordinated assessment<br>Housing: use of rapid rehousing<br>Housing: use of any homeless services (emergency shelter, coordinated assessment, rapid rehousing)                                                                                                                                                                                                                                                                                                                                                                                                                                                                                                                                                                                                                                                                                                                                                                                                    | Homeless Management Information System<br>HMIS<br>HMIS<br>HMIS                                                                                                                                                                                                                                                                                                                                              | $\chi^2 = 6.20$ , $p < .05$<br>$\chi^2 = 5.88$ , $p < .05$<br>No effect<br>$\chi^2 = 5.67$ , $p < .05$                                                                                                                                                                                                                                                                                                                                                                           |
| da Silva et al 2017                                                                                        | 9 months                 | Mental Health: mean score of the mental health component subscale<br>Family Support: mean score of personal and social relationships subscale<br>Social Support: mean score of personal and social relationships subscale                                                                                                                                                                                                                                                                                                                                                                                                                                                                                                                                                                                                                                                                                                                                                                                               | SF-12<br>Personal and Social Performance (PSP)<br>PSP                                                                                                                                                                                                                                                                                                                                                       | No effect<br>No effect<br>No effect                                                                                                                                                                                                                                                                                                                                                                                                                                              |
| de Vet et al 2017                                                                                          | 9 months                 | Housing: number of days rehoused, defined as living in conventional independent housing or accommodation permanently provided by relatives, friends, or acquaintances<br>Mental Health: mean global severity index score<br>Substance Use: excessive alcohol use (i.e., five or more drinks a day) in the past 30 days<br>Substance Use: cannabis use in the past 30 days<br>Family Support: mean score of how often relatives are available to provide practical and emotional support<br>Social Support: mean score of how often friends or acquaintances are available to provide practical and emotional support<br>Quality of Life: two-item average quality of life score                                                                                                                                                                                                                                                                                                                                         | Residential Follow-Back Calendar<br>Brief Symptom Inventory<br>European Addiction Severity Index<br>European Addiction Severity Index<br>5-item scale from the RAND Course of<br>5-item scale from the RAND Course of<br>Lehman's Brief Quality of Life Interview                                                                                                                                           | No effect<br>Mean difference: -.14, 95% CI: -.29-.01, $p < .10$<br>No effect<br>No effect<br>OR=.36, 95% CI: .02-.71<br>No effect<br>No effect                                                                                                                                                                                                                                                                                                                                   |
| Dixon et al., 2009                                                                                         | 6 months                 | Service Engagement: number of days to first mental health or substance use outpatient visit since hospital discharge<br>Service Engagement: percentage of participants who had a greater number of mental health and substance use visits<br>Service Engagement: number of mental health or substance use outpatient treatment visits<br>Service Engagement: greater continuity of care defined as a greater number of two-month blocks with two or more outpatient visits<br>Hospitalization/Emergency Services: rate of inpatient hospital days<br>Hospitalization/Emergency Services: rate of emergency room visits<br>Mental Health: total mental health severity score<br>Mental Health: total positive symptoms subscales<br>Mental Health: total negative symptoms subscale<br>Family Support: mean score of family relations subscale<br>Social Support: mean score of social relations subscale<br>Quality of Life: mean scores of eight subscales...                                                          | VA performance measures<br>VA performance measures<br>VA performance measures<br>VA performance measures<br>VA performance measures<br>VA performance measures<br>VA performance measures<br>Brief Psychiatric Rating Scale<br>Brief Psychiatric Rating Scale<br>Brief Psychiatric Rating Scale<br>Lehman Quality of Life Interview<br>Lehman Quality of Life Interview<br>Lehman Quality of Life Interview | Hazard Ratio: 2.73, 95% CI: 1.80-4.15<br>All patients in B-CTI group had an outpatient visit, thus no response<br>Event Rate Ratio: 2.14, 95% CI: 1.58-2.91<br>Mean difference: .63, 95% CI: .28-.97<br>Event Rate Ratio: 1.28, 95% CI: .75-2.17<br>Event Rate Ratio: .67, 95% CI: .32-1.36<br>No effect<br>No effect<br>No effect<br>No effect<br>No effect<br>p=.013                                                                                                           |
|                                                                                                            |                          | Living situation<br>Daily activities and functioning<br>Finances<br>Work and school<br>Legal and safety issues<br>Health                                                                                                                                                                                                                                                                                                                                                                                                                                                                                                                                                                                                                                                                                                                                                                                                                                                                                                |                                                                                                                                                                                                                                                                                                                                                                                                             | No effect<br>No effect<br>No effect<br>No effect<br>p=.026<br>No effect                                                                                                                                                                                                                                                                                                                                                                                                          |
| Herman et al., 2011<br>(Baumgartner & Herman, 2012; Tomita & Herman, 2012; Tomita, Lukens, & Herman, 2014) | 9 and 18 months          | Housing: any homelessness<br>Housing: number of homeless nights<br>Service Engagement: continuity of care defined as...<br>Mean score of perceived ease of access to care<br>Stability in patient-provider relationship as measured by any changes in providers (psychiatrist, case manager, and therapist)<br>Stability in patient-provider relationships as measured by length of working relationship with providers (psychiatrist, case manager, and therapist)<br>Stability in patient-provider relationship as measured by number of changes in providers (psychiatrist, case manager, and therapist)<br>Severity of instability in patient-provider relationship as measured by mean score of perceived quality of transition care by psychiatrists and case managers/therapists<br>Hospitalization/Emergency Services: any psychiatric rehospitalizations<br>Family Support: mean score of frequency of family contact subscale<br>Family Support: mean score of satisfaction with family relationship subscale | Personal History Form<br>Personal History Form<br>4-item measure adapted from Bindman and Participant Interview<br>Ware Continuity of Care Measure<br>Ware Continuity of Care Measure<br>Ware Continuity of Care Measure<br>Personal History Form<br>Lehman Quality of Life Interview<br>Lehman Quality of Life Interview                                                                                   | Last 3 intervals: OR=.22, 95% CI: .06-.88<br>Last 3 intervals: $p < .001$<br>18 months: $b = .73$ ; $p = .02$<br>Case manager/therapist at 9 months: $\chi^2 = 4.0$ , $p < .05$<br>Psychiatrist at 9 months: $p = .05$<br>Case manager at 9 months: $p < .05$<br>Case manager/therapist at 18 months: $p = .01$<br>Psychiatrist transition at 9 months: $b = 37.5$ , $p = .03$<br>OR=.11, 95% CI: .01-.96<br>18 months: $b = .47$ , $p = .02$<br>9 months: $b = .66$ , $p = .02$ |
| Lako et al., 2018                                                                                          | 9 months                 | Mental Health: mean score of PTSD symptom scale<br>Mental Health: mean score of depression scale<br>Mental Health: mean score of Global Severity Index<br>Mental Health: mean score of self-esteem scale<br>Family Support: mean score of availability of family support scale<br>Social Support: mean score of availability of friends or other acquaintances scale<br>Quality of Life: mean score of general life satisfaction defined as how the participant feels about their life in general                                                                                                                                                                                                                                                                                                                                                                                                                                                                                                                       | Impact of Event Scale<br>Center for Epidemiological Studies<br>Brief Symptom Inventory<br>Rosenberg Self-Esteem Scale<br>Adapted from RAND Course of<br>Adapted from RAND Course of<br>Lehman Quality of Life Interview                                                                                                                                                                                     | Mean difference= - 7.27, 95% CI= -14.31 - -.22, $p = .04$<br>No effect<br>No effect<br>No effect<br>No effect<br>No effect<br>No effect                                                                                                                                                                                                                                                                                                                                          |
| Samuels et al., 2015<br>(Shinn et al., 2015)                                                               | 15 months                | Housing: probability of remaining in homeless shelter<br>Service Engagement: any mental health service use<br>Mental Health: mean Global Severity Index score<br>Mental Health: mother-reported internalizing behaviors of children<br>Mental Health: mother-reported externalizing behaviors of children<br>Mental Health: child-reported internalizing behaviors<br>Mental Health: child-reported externalizing behaviors<br>Mental Health: child-reported depressive symptoms                                                                                                                                                                                                                                                                                                                                                                                                                                                                                                                                        | Residential Follow-Back Instrument<br>Participant Interview<br>Brief Symptom Inventory<br>Child Behavior Checklist<br>Child Behavior Checklist<br>Youth Self-Report<br>Youth Self-Report<br>Children's Depression Inventory                                                                                                                                                                                 | Significantly fewer days in the shelter until rehoused among FCTI<br>n/a<br>No effect<br>Ages 1.5-5 years: $b = -3.65$ , $p < .01$<br>Ages 1.5-5 years: $b = -3.12$ , $p < .01$<br>No effect<br>No effect<br>No effect                                                                                                                                                                                                                                                           |
| Shaw et al., 2017                                                                                          | 6 weeks, 6 and 12 months | Service Engagement: proportion of participants still engaged with community mental health team<br>Service Engagement: engagement with mental health services (care coordinator, care plan, medication)                                                                                                                                                                                                                                                                                                                                                                                                                                                                                                                                                                                                                                                                                                                                                                                                                  | Participant Interview<br>Participant Interview                                                                                                                                                                                                                                                                                                                                                              | 6 weeks and 6 months: $p < .05$<br>6 weeks and 6 months: $p < .05$                                                                                                                                                                                                                                                                                                                                                                                                               |
| Susser et al., 1997<br>(Herman et al., 2000; Jones et al., 2003)                                           | 18 months                | Housing: number of homeless nights<br>Housing: risk of homelessness<br>Housing: extended homelessness as measured by more than 54 nights<br>Housing: intermediate homelessness as measured by 30-54 nights<br>Housing: transient homelessness as measured by 1-29 nights<br>Mental Health: mean positive symptoms scale<br>Mental Health: mean negative symptoms scale                                                                                                                                                                                                                                                                                                                                                                                                                                                                                                                                                                                                                                                  | Personal History Form<br>Personal History Form<br>Personal History Form<br>Personal History Form<br>Personal History Form<br>Positive and Negative Syndrome Scale<br>PANSS                                                                                                                                                                                                                                  | p=.003<br>Relative risk=.36, 95% CI=.12-1.06<br>Relative risk=.53, 95% CI=.27-1.01<br>No effect<br>No effect<br>No effect<br>p=.02                                                                                                                                                                                                                                                                                                                                               |

|                                                   |           |                                                                                                                               |                                      |                                                                            |
|---------------------------------------------------|-----------|-------------------------------------------------------------------------------------------------------------------------------|--------------------------------------|----------------------------------------------------------------------------|
| Stergiopoulos et al., 2017                        | 12 months | Mental Health: mean general psychopathology scale                                                                             | PANSS                                | No effect                                                                  |
|                                                   |           | Service Engagement: visits to primary care providers                                                                          | Administrative data                  | No effect                                                                  |
|                                                   |           | Hospitalization/Emergency Services: length of stay (days) in the hospital                                                     | Administrative data                  | No effect                                                                  |
|                                                   |           | Hospitalization/Emergency Services: frequency of hospital admissions                                                          | Administrative data                  | No effect                                                                  |
|                                                   |           | Hospitalization/Emergency Services: frequency of emergency department visits                                                  | Administrative data                  | No effect                                                                  |
|                                                   |           | Mental Health: mental health severity in the past month                                                                       | Colorado Symptom Index               | No effect                                                                  |
|                                                   |           | Substance Use: alcohol and drug addiction severity                                                                            | Addiction Severity Index             | No effect                                                                  |
|                                                   |           | Quality of Life: health-related quality of life as measured by the means physical health and mental component subscale scores | Symptom Functioning-12               | No effect                                                                  |
|                                                   |           | Quality of Life: overall health quality of life                                                                               | EuroQoL- 5 Dimension Visual Analogue | No effect                                                                  |
| Quality of Life: disease-specific quality of life | QoL1-20   | Mean difference=-9.12, 95% CI=-17.57- -.67, p=.04                                                                             |                                      |                                                                            |
| Quasi-Experimental                                |           |                                                                                                                               |                                      |                                                                            |
| Kasprow & Rosenheck, 2007                         | 12 months | Housing: number of days housed (i.e., living in own home or with others)                                                      | Self-report Interview                | p<.01                                                                      |
|                                                   |           | Housing: number of days in institution (i.e., hospital, residential treatment, or jail)                                       | Administrative data                  | p<.05                                                                      |
|                                                   |           | Housing: number of days homeless                                                                                              | Self-report Interview                | No effect                                                                  |
|                                                   |           | Mental Health: level of psychiatric symptoms                                                                                  | Addiction Severity Index             | p<.001                                                                     |
|                                                   |           | Substance Use: level of alcohol use                                                                                           | Addiction Severity Index             | p<.001                                                                     |
|                                                   |           | Substance Use: level of drug use                                                                                              | Addiction Severity Index             | p<.01                                                                      |
|                                                   |           | Substance Use: alcohol use expenditures                                                                                       | Not specified                        | p<.05                                                                      |
|                                                   |           | Substance Use: drug use expenditures                                                                                          | Not specified                        | p<.05                                                                      |
| Nossel et al., 2016                               | 12 months | Service Engagement: any outpatient service use                                                                                | Medicaid Claims data                 | CTI reportedly had significantly greater contact with outpatient services. |
|                                                   |           | Hospitalization/Emergency Services: any emergency or inpatient service use                                                    | Medicaid Claims data                 | Reduction by .46 times for both groups, 95% CI=.35-.61                     |
| Shaffer et al., 2015                              | 3 months  | Service Engagement: substance use disorder outpatient service use                                                             | Administrative Claims data           | No effect                                                                  |
|                                                   |           | Hospitalization/Emergency Services: early hospital readmission within 30 days                                                 | Administrative Claims data           | OR=2.83, 95% CI=1.72-4.65, p<.001                                          |
|                                                   |           | Hospitalization/Emergency Services: long-term hospital readmission within 31-180 days                                         | Administrative Claims data           | No effect                                                                  |
|                                                   |           | Hospitalization/Emergency Services: mental health crisis service use                                                          | Administrative Claims data           | No effect                                                                  |
|                                                   |           | Hospitalization/Emergency Services: mental health outpatient service use                                                      | Administrative Claims data           | No effect                                                                  |
